# Supplementary material for: Secondary transfer of emergency stroke patients eligible for mechanical thrombectomy by air in rural England: economic evaluation and considerations
Source: HighWire-hosted journal article supplement (doi:10.1136/emermed-2019-209039), 2020-11-10
Supplement: emermed-2019-209039supp001_data_supplement.pdf [file emermed-2019-209039supp001_data_supplement.pdf]

## Supplemental Appendix

**Table S1:** Rural NHS hospitals and their populations

**Table S2:** Remote hospitals, nearest neuroscience centre, travel distance and time, air ambulance service

**Table S3:** Estimated number of stroke patients and potential costs and health effects implications for air ambulance in rural England

**Table S4:** Model parameters for decision-tree and range of values for sensitivity analysis

**Table S5:** Model parameters for Markov model and range of values for sensitivity analysis

**Table S6:** Time horizons probabilistic sensitivity analysis for early presenters

**Table S7:** Scenario analysis for early presenters

**Table S8a:** Scenario analysis for late presenters based on DAWN trial eligibility

**Table S8b:** Parameters' point estimate for late presenters

**Figure S1:** Monte Carlo simulations of incremental cost per QALY gained from mechanical thrombectomy within a cohort of 1,000 patients using a Willingness-To-Pay (WTP) threshold of A) £ 20,000 per QALY gained and B) £30,000 per QALY gained for early-presenters.

**Figure S2:** Monte Carlo simulations of incremental cost per QALY gained from mechanical thrombectomy within a cohort of 1,000 patients for late presenters

**Figure S3:** Cost-effectiveness acceptability curve for late presenters by transportation strategy

**Table S1:** Rural NHS hospitals and their populations

| Hospital                      | Location                     | Total population | Proportion Remote | Remote Population |
|-------------------------------|------------------------------|------------------|-------------------|-------------------|
| St Mary's Hospital            | Isle of Wight                | 138,393          | 1                 | 138,393           |
| North Devon District Hospital | Barnstaple, North Devon      | 169,852          | 0.810             | 137,580           |
| Furness General Hospital      | Barrow, Cumbria              | 111,207          | 0.617             | 68,615            |
| Pilgrim Hospital              | Boston, Lincolnshire         | 190,677          | 0.268             | 51,101            |
| Hereford County Hospital      | Hereford, Herefordshire      | 182,303          | 0.236             | 43,024            |
| Cumberland Infirmary          | Carlisle, Cumbria            | 178,338          | 0.213             | 37,986            |
| Scarborough General Hospital  | Scarborough, North Yorkshire | 194,103          | 0.105             | 20,381            |
| Dorset County Hospital        | Dorchester, Dorset           | 162,271          | 0.042             | 6,815             |
| Royal Shrewsbury Hospital     | Shrewsbury, Shropshire       | 199,154          | 0.024             | 4,780             |
| * Royal Cornwall Hospital     | Truro, Cornwall              | 420,000          | 0.01              | 4,200             |
|                               |                              | <b>1,946,298</b> |                   | <b>512,875</b>    |

\*Includes Isle of Scilly

**Data source:** Smyth C, Lorrimer S and Chaplin M. (2016)

**Table S2:** Remote hospitals, nearest neuroscience centre, travel distance and time, air ambulance service

| Hospital                      | Location                | Nearest neuroscience centre | Distance (miles) | Ground Emergency Medical Services Travel Time (Mins) | Helicopter Emergency Medical Service |
|-------------------------------|-------------------------|-----------------------------|------------------|------------------------------------------------------|--------------------------------------|
| St Mary's Hospital            | Isle of Wight           | Southampton                 | 17.0             | 128                                                  | Hampshire & Isle of Wight            |
| North Devon District Hospital | Barnstaple, Devon       | Plymouth                    | 59.6             | 113                                                  | Devon                                |
| Furness General Hospital      | Barrow, Cumbria         | Preston                     | 134.0            | 155                                                  | North West Air Ambulance             |
| Pilgrim Hospital              | Boston, Lincolnshire    | Nottingham                  | 60.3             | 107                                                  | Lincolnshire & Nottinghamshire       |
| Hereford County Hospital      | Hereford, Herefordshire | Birmingham                  | 57.8             | 95                                                   | Midlands                             |
| Cumberland Infirmary          | Carlisle, Cumbria       | Newcastle-upon-Tyne         | 59.7             | 80                                                   | Great North Air Ambulance            |
| Scarborough General Hospital  | Scarborough, Yorkshire  | Hull                        | 45.8             | 102                                                  | Yorkshire                            |
| Dorset County Hospital        | Dorchester, Dorset      | Southampton                 | 57.3             | 83                                                   | Dorset & Somerset                    |
| Royal Shrewsbury Hospital     | Shrewsbury, Shropshire  | Stoke-on-Trent              | 41.5             | 71                                                   | Midlands                             |
| Royal Cornwall Hospital       | Truro, Cornwall         | Plymouth                    | 54.7             | 99                                                   | Cornwall                             |

**Data Source:** Ambulance travel distances and times calculated from Google Maps. This approach was deemed reasonable by previous research by team members that suggested that ambulances in urban areas were able to exceed general traffic speed, whereas, the opposite effect was seen in suburban and rural road networks (McMeekin *et al.* 2014).

**Table S3:** Estimated number of stroke patients and potential costs and health effects implications for air ambulance in rural England

| Hospital                      | No. of Stroke Patients | No. of Early Presenters | Hypothetical Change in Travel Time by Air (Mins) | Mean Cost Savings (95% CI)        | Mean QALYs (95% CI) |
|-------------------------------|------------------------|-------------------------|--------------------------------------------------|-----------------------------------|---------------------|
| St Mary's Hospital            | 302                    | 38                      | -90                                              | -£30,458<br>(-£244,479, £167,373) | 4<br>(0, 11)        |
| North Devon District Hospital | 425                    | 53                      | -60                                              | -£34,974<br>(-£247,921, £171,028) | 4<br>(0, 12)        |
| Furness General Hospital      | 219                    | 29                      | -60                                              | -£20,862<br>(-£213,713, £156,117) | 3<br>(0, 8)         |
| Pilgrim Hospital              | 523                    | 66                      | -90                                              | -£50,244<br>(-£314,467, £193,994) | 6<br>(0, 17)        |
| Hereford County Hospital      | 518                    | 66                      | -60                                              | -£36,682<br>(-£252,585, £167,275) | 5<br>(0, 13)        |
| Cumberland Infirmary          | 410                    | 52                      | -30                                              | -£24,750<br>(-£193,220, £129,426) | 3<br>(0, 9)         |
| Scarborough General Hospital  | 250                    | 32                      | -60                                              | -£22,544<br>(-£219,912, £157,472) | 3<br>(0, 10)        |
| Dorset County Hospital        | 407                    | 52                      | -45                                              | -£25,145<br>(-£211,643, £150,287) | 3<br>(0, 11)        |
| Royal Shrewsbury Hospital     | 64                     | 8                       | -15                                              | -£27,923<br>(-£151,294, £84,338)  | 2<br>(0, 7)         |
| Royal Cornwall Hospital       | 828                    | 105                     | -60                                              | -£61,493<br>(-£319,867, £201,647) | 7<br>(1, 17)        |

**Data source:** Number of stroke patients per rural hospital from SSNAP data. Estimated number of early presenters eligible for mechanical thrombectomy based on McMeekin *et al.* 2017. The hypothetical change in travel time is based on best possible conditions and a readily available helicopter emergency medical services at rural hospital. This does not take account of a myriad of factors that could affect ability to transport patient such as bad weather, normal working hours and medical consideration such as fear of flying or weight/size. Estimated change in travel time with resulting mean cost savings and QALYs are based on discrete event simulation available from McMeekin *et al.* 2019.

**Table S4:** Model parameters for decision-tree and range of values for sensitivity analysis

| Parameter                                 | Point Estimate | Probability Distribution Function | Source                                    |
|-------------------------------------------|----------------|-----------------------------------|-------------------------------------------|
| <b>Decision tree</b>                      |                |                                   |                                           |
| Eligibility for MT after advanced imaging | 0.95           | Beta                              | McMeekin et al. 2017                      |
| Received MT after transfer                | 0.95           | Beta                              | McMeekin et al. 2017                      |
| Cost of HEMS                              | £2,900         | Gamma                             | Great North Air Ambulance (GNAA)          |
| Cost of GEMS                              | £252           | Gamma                             | NHS Reference Costs 2017-18 (Code: ASS02) |
| <b>MT by HEMS:</b>                        |                |                                   |                                           |
| mRS 0-2 (IV-tPA + MT)                     | 0.57           | Conditional beta                  | Extrapolated Saver et al. 2016            |
| mRS 3-5 (IV-tPA + MT)                     | 0.36           | Conditional beta                  | Extrapolated Saver et al. 2016            |
| mRS 6 (IV-tPA + MT)                       | 0.08           | Conditional beta                  | Extrapolated Saver et al. 2016            |
| <b>MT by GEMS:</b>                        |                |                                   |                                           |
| mRS 0-2 (IV-tPA + MT)                     | 0.53           | Conditional beta                  | Extrapolated Saver et al. 2016            |
| mRS 3-5 (IV-tPA + MT)                     | 0.39           | Conditional beta                  | Extrapolated Saver et al. 2016            |
| mRS 6 (IV-tPA + MT)                       | 0.10           | Conditional beta                  | Extrapolated Saver et al. 2016            |
| <b>IV-tPA only:</b>                       |                |                                   |                                           |
| mRS 0-2 (IV-tPA only)                     | 0.26           | Conditional beta                  | Ganesalingam et al. 2015                  |
| mRS 3-5 (IV-tPA only)                     | 0.55           | Conditional beta                  | Ganesalingam et al. 2015                  |
| mRS 6 (IV-tPA only)                       | 0.19           | Conditional beta                  | Ganesalingam et al. 2015                  |

**Table S5:** Model parameters for Markov model and range of values for sensitivity analysis

| Parameter                         | Point Estimate | Probability Distribution Function | Source                 |
|-----------------------------------|----------------|-----------------------------------|------------------------|
| <b>Year 1</b>                     |                |                                   |                        |
| From independent (mRS 0-2) to:    |                |                                   |                        |
| mRS 0-2                           | 0.955          | Conditional beta                  | Davis et al. 2012      |
| mRS 3-5                           | 0.024          | Conditional beta                  | Davis et al. 2012      |
| Recurrent stroke                  | 0.013          | Conditional beta                  | Davis et al. 2012      |
| Dead                              | 0.008          | Conditional beta                  | Davis et al. 2012      |
| From dependent (mRS 3-5) to:      |                |                                   |                        |
| mRS 0-2                           | 0.029          | Conditional beta                  | Davis et al. 2012      |
| mRS 3-5                           | 0.919          | Conditional beta                  | Davis et al. 2012      |
| Recurrent stroke                  | 0.013          | Conditional beta                  | Davis et al. 2012      |
| Dead                              | 0.039          | Conditional beta                  | Davis et al. 2012      |
| <b>After Year 1</b>               |                |                                   |                        |
| From independent (mRS 0-2) to:    |                |                                   |                        |
| mRS 0-2                           | 0.979          | Conditional beta                  | Davis et al. 2012      |
| mRS 3-5                           | 0              | Conditional beta                  | Davis et al. 2012      |
| Recurrent stroke                  | 0.013          | Conditional beta                  | Davis et al. 2012      |
| Dead                              | 0.008          | Conditional beta                  | Davis et al. 2012      |
| From dependent (mRS 3-5) to:      |                |                                   |                        |
| mRS 0-2                           | 0              | Conditional beta                  | Davis et al. 2012      |
| mRS 3-5                           | 0.948          | Conditional beta                  | Davis et al. 2012      |
| Recurrent stroke                  | 0.013          | Conditional beta                  | Davis et al. 2012      |
| Dead                              | 0.039          | Conditional beta                  | Davis et al. 2012      |
| <b>Recurrent stroke to:</b>       |                |                                   |                        |
| (IV-tPA + Throm) mRS 0-2          | 0.867          | Conditional beta                  | Davis et al. 2012      |
| (IV-tPA + Throm) mRS 3-5          | 0.104          | Conditional beta                  | Davis et al. 2012      |
| (IV-tPA + Throm) recurrent stroke | 0              | Conditional beta                  | Davis et al. 2012      |
| (IV-tPA + Throm) dead             | 0.029          | Conditional beta                  | Davis et al. 2012      |
| (IV-tPA alone) mRS 0-2            | 0.834          | Conditional beta                  | Davis et al. 2012      |
| (IV-tPA alone) mRS 3-5            | 0.137          | Conditional beta                  | Davis et al. 2012      |
| (IV-tPA alone) recurrent stroke   | 0              | Conditional beta                  | Davis et al. 2012      |
| (IV-tPA alone) dead               | 0.029          | Conditional beta                  | Davis et al. 2012      |
| <b>Health Utilities</b>           |                |                                   |                        |
| Independent                       | 0.74           | Beta                              | Sandercock et al. 2002 |
| Dependent                         | 0.38           | Beta                              | Sandercock et al. 2002 |

|                              |            |       |                                             |
|------------------------------|------------|-------|---------------------------------------------|
| Recurrent stroke             | 0.34       | Beta  | Sandercock et al. 2002                      |
| <b>Costs</b>                 |            |       |                                             |
| IV-tPA (Drug & 24-hr care)   | £2,339.34  | Gamma | BNF 2018 & Davis et al. 2012                |
| Thrombectomy (24-hour)       | £8,479.27  | Gamma | Balami et al. 2018                          |
| <b>First 3 months:</b>       |            |       |                                             |
| Independent                  | £7,773.00  | Gamma | Ganesalingam et al. 2015                    |
| Dependent                    | £16,632.70 | Gamma | Ganesalingam et al. 2015                    |
| Fatal                        | £10,658.07 | Gamma | Ganesalingam et al. 2015                    |
| <b>Ongoing per 3 months:</b> |            |       |                                             |
| Independent                  | £748.53    | Gamma | Youman et al 2003                           |
| Dependent                    | £2,014.12  | Gamma | Youman et al 2003                           |
| <b>Recurrent Stroke</b>      |            |       |                                             |
| Average NHS stroke patient   | £13,935.53 | Gamma | Xu et al.2017                               |
| <b>Mortality Factor</b>      |            |       |                                             |
| Independent                  | 1.16       | -     | Davis et al. 2012, Ganesalingam et al. 2015 |
| Dependent                    | 5.65       | -     | Davis et al. 2012, Ganesalingam et al. 2015 |

**Note:** NHS costs were valued at 2017-2018 prices using a Bank of England inflation calculator.



**Table S6:** Time horizons probabilistic sensitivity analysis for early presenters

| Time Horizon | Helicopter Emergency Medical Service |                        | Ground Emergency Medical Services |                        | Incremental Cost (95% CI) | Incremental QALYs gained (95% CI) | Incremental Cost/QALY gained (ICER) | % CE at £20K/QALY | % CE at £30K/QALY |
|--------------|--------------------------------------|------------------------|-----------------------------------|------------------------|---------------------------|-----------------------------------|-------------------------------------|-------------------|-------------------|
|              | Mean Cost (SE)                       | Mean QALYs gained (SE) | Mean Cost (SE)                    | Mean QALYs gained (SE) |                           |                                   |                                     |                   |                   |
| 1-year       | £26,765 (£41)                        | 0.64 (0.00)            | £24,325 (£41)                     | 0.63 (0.00)            | £2,440 (£2,380, £2,500)   | 0.02 (0.02, 0.02)                 | £139,306                            | 0.0               | 0.0               |
| 3-year       | £35,433 (£53)                        | 1.53 (0.00)            | £32,679 (£53)                     | 1.49 (0.00)            | £2,743 (£2,680, £2,800)   | 0.04 (0.04, 0.04)                 | £65,803                             | 0.1               | 2.8               |
| 5-year       | £42,375 (£79)                        | 2.27 (0.01)            | £39,374 (£78)                     | 2.21 (0.01)            | £3,000 (£2,940, £3,060)   | 0.06 (0.06, 0.07)                 | £47,910                             | 1.2               | 11.1              |
| 10-year      | £53,580 (£175)                       | 3.51 (0.00)            | £50,130 (£170)                    | 3.40 (0.01)            | £3,450 (£3,380, £3,520)   | 0.10 (0.09, 0.11)                 | £34,066                             | 7.9               | 34.4              |
| 15-year      | £58,547 (£256)                       | 4.10 (0.02)            | £54,873 (£248)                    | 3.98 (0.02)            | £3,674 (£3,590, £3,760)   | 0.12 (0.11, 0.13)                 | £29,961                             | 12.2              | 54.4              |
| 20-year      | £60,242 (£300)                       | 4.33 (0.03)            | £56,484 (£289)                    | 4.20 (0.03)            | £3,758 (£3,670, £3,840)   | 0.13 (0.12, 0.14)                 | £28,533                             | 14.1              | 61.3              |

**Table S7:** Scenario analysis for early presenters

| Travel Time (Mins)  | 30 minutes difference           |                                 |             |                          |                          |
|---------------------|---------------------------------|---------------------------------|-------------|--------------------------|--------------------------|
| <i>HEMS vs GEMS</i> | <i>HEMS (pInd; pDep; pDead)</i> | <i>GEMS (pInd; pDep; pDead)</i> | <i>ICER</i> | <i>% CE at £20k/QALY</i> | <i>% CE at £30k/QALY</i> |
| 330 vs 360          | 0.55;0.37;0.08                  | 0.53;0.39;0.08                  | £70,876     | 5.0                      | 12.8                     |
| 300 vs 330          | 0.57;0.36;0.07                  | 0.55;0.37;0.08                  | £52,939     | 6.2                      | 15.5                     |
| 270 vs 300          | 0.59;0.35;0.06                  | 0.57;0.36;0.07                  | £52,629     | 7.1                      | 16.1                     |
| 210 vs 240          | 0.62;0.32;0.06                  | 0.61;0.33;0.06                  | £151,866    | 6.7                      | 12.4                     |

| Travel Time (Mins)  | 15 minutes difference           |                                 |             |                          |                          |
|---------------------|---------------------------------|---------------------------------|-------------|--------------------------|--------------------------|
| <i>HEMS vs GEMS</i> | <i>HEMS (pInd; pDep; pDead)</i> | <i>GEMS (pInd; pDep; pDead)</i> | <i>ICER</i> | <i>% CE at £20k/QALY</i> | <i>% CE at £30k/QALY</i> |
| 345 vs 360          | 0.54;0.38;0.08                  | 0.53;0.39;0.08                  | £158,896    | 2.9                      | 8.4                      |
| 315 vs 330          | 0.56;0.37;0.07                  | 0.55;0.37;0.08                  | £85,862     | 4.2                      | 10.4                     |
| 285 vs 300          | 0.58;0.35;0.07                  | 0.57;0.36;0.07                  | £155,374    | 4.8                      | 10.8                     |
| 225 vs 240          | 0.62;0.33;0.05                  | 0.61;0.33;0.06                  | £83,744     | 6.7                      | 14.0                     |

**Table S8a:** Scenario analysis for late presenters based on DAWN trial eligibility

|                                   | HEMS                 |                                 | GEMS                 |                                 | Incremental Cost<br>(95% CI) | Incremental<br>QALYs<br>gained<br>(95% CI) | Incremental<br>Cost /QALY<br>gained<br>(ICER) | Incremental<br>Net<br>Monetary<br>Benefit |
|-----------------------------------|----------------------|---------------------------------|----------------------|---------------------------------|------------------------------|--------------------------------------------|-----------------------------------------------|-------------------------------------------|
|                                   | Mean<br>Cost<br>(SE) | Mean<br>QALYs<br>gained<br>(SE) | Mean<br>Cost<br>(SE) | Mean<br>QALYs<br>gained<br>(SE) |                              |                                            |                                               |                                           |
| <b>Deterministic<br/>Analysis</b> | £54,632<br>(£6)      | 3.41<br>(0.00)                  | £51,217<br>(£5)      | 3.42<br>(0.00)                  | £3,416<br>(£3,411, £3,421)   | -0.01<br>(-0.01, -0.01)                    | Dominated                                     | -                                         |
| <b>Probabilistic<br/>Analysis</b> | £55,000<br>(£316)    | 3.41<br>(0.03)                  | £51,536<br>(£310)    | 3.42<br>(0.03)                  | £3,463<br>(£3,378, £3,548)   | -0.01<br>(-0.01, -0.01)                    | Dominated                                     | -                                         |

**Table 8b:** Parameters' point estimate for late presenters

| Parameter                                 | Point Estimate | Probability Distribution Function | Source                          |
|-------------------------------------------|----------------|-----------------------------------|---------------------------------|
| Eligibility for MT after advanced imaging | 0.50           | Beta                              | Expert opinion                  |
| Received MT after transfer                | 0.50           | Beta                              | Expert opinion                  |
| <b>MT by HEMS:</b>                        |                |                                   |                                 |
| mRS 0-2 (IV-tPA + MT)                     | 0.40           | Conditional beta                  | Albers et al. 2018 (DAWN trial) |
| mRS 3-5 (IV-tPA + MT)                     | 0.46           | Conditional beta                  | Albers et al. 2018 (DAWN trial) |
| <b>MT by GEMS:</b>                        |                |                                   |                                 |
| mRS 0-2 (IV-tPA + MT)                     | 0.38           | Conditional beta                  | Albers et al. 2018 (DAWN trial) |
| mRS 3-5 (IV-tPA + MT)                     | 0.48           | Conditional beta                  | Albers et al. 2018 (DAWN trial) |

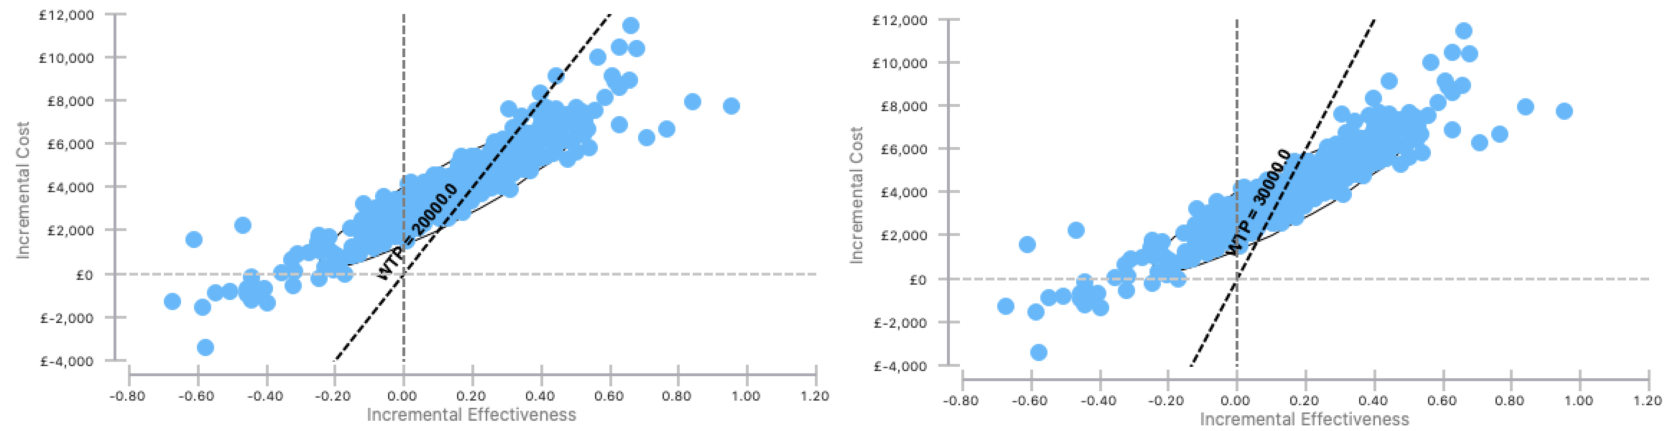

**Figure S1:** Monte Carlo simulations of incremental cost per QALY gained from mechanical thrombectomy within a cohort of 1,000 patients using a Willingness-To-Pay (WTP) threshold of A) £ 20,000 per QALY gained and B) £30,000 per QALY gained for early-presenters. Also included is the 95% credible region of the ICER using the confidence ellipse method.

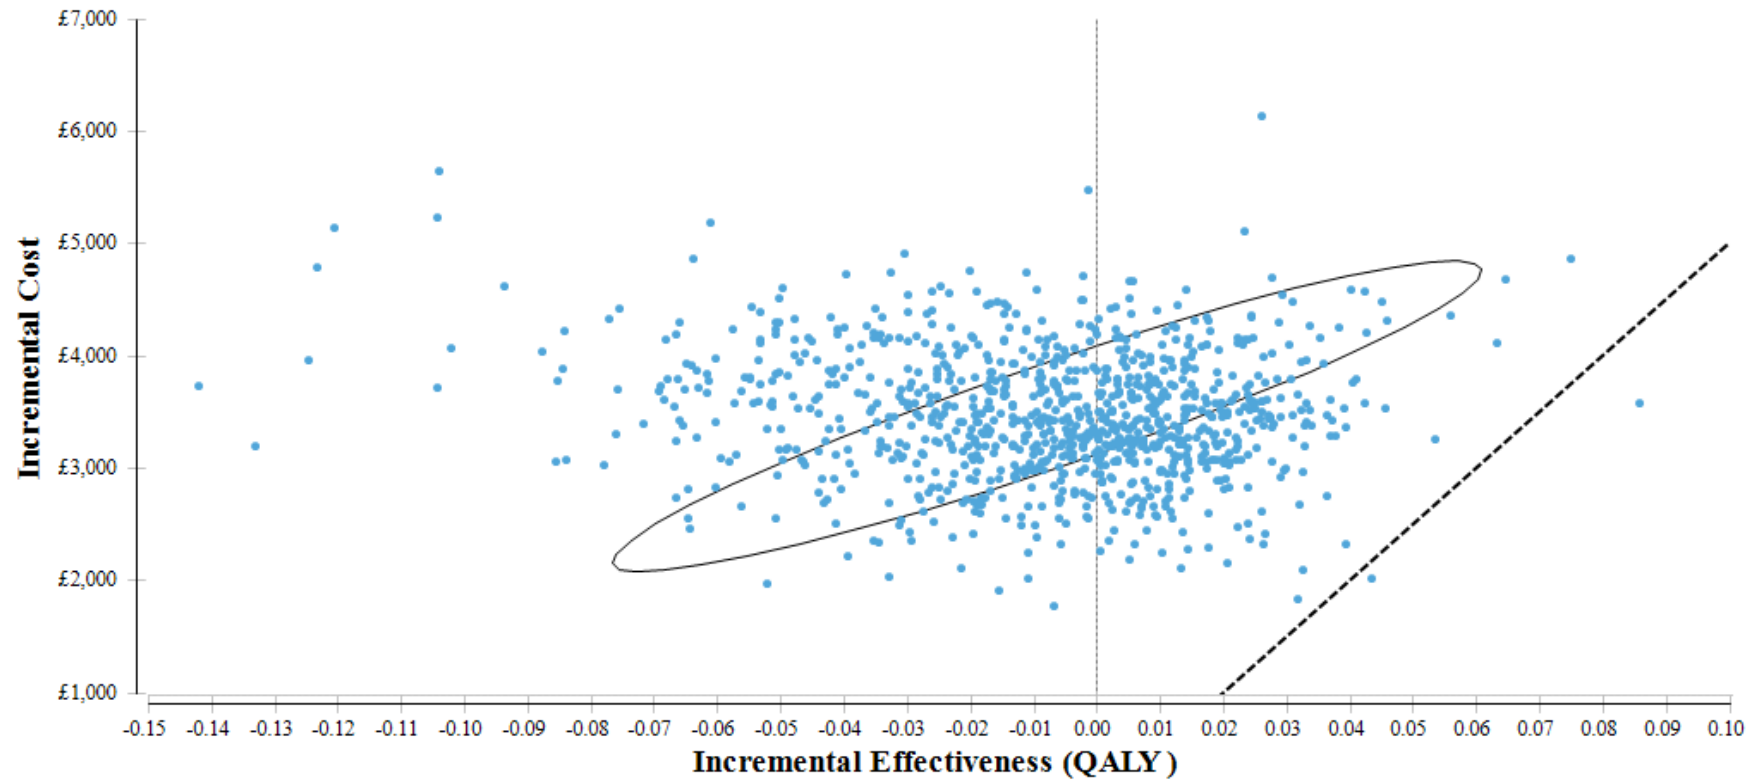

**Figure S2:** Monte Carlo simulations of incremental cost per QALY gained from mechanical thrombectomy within a cohort of 1,000 patients using a Willingness-To-Pay (WTP) threshold of £50,000 per QALY gained for late-presenters. Also included is the 95% credible region of the ICER using the confidence ellipse method.

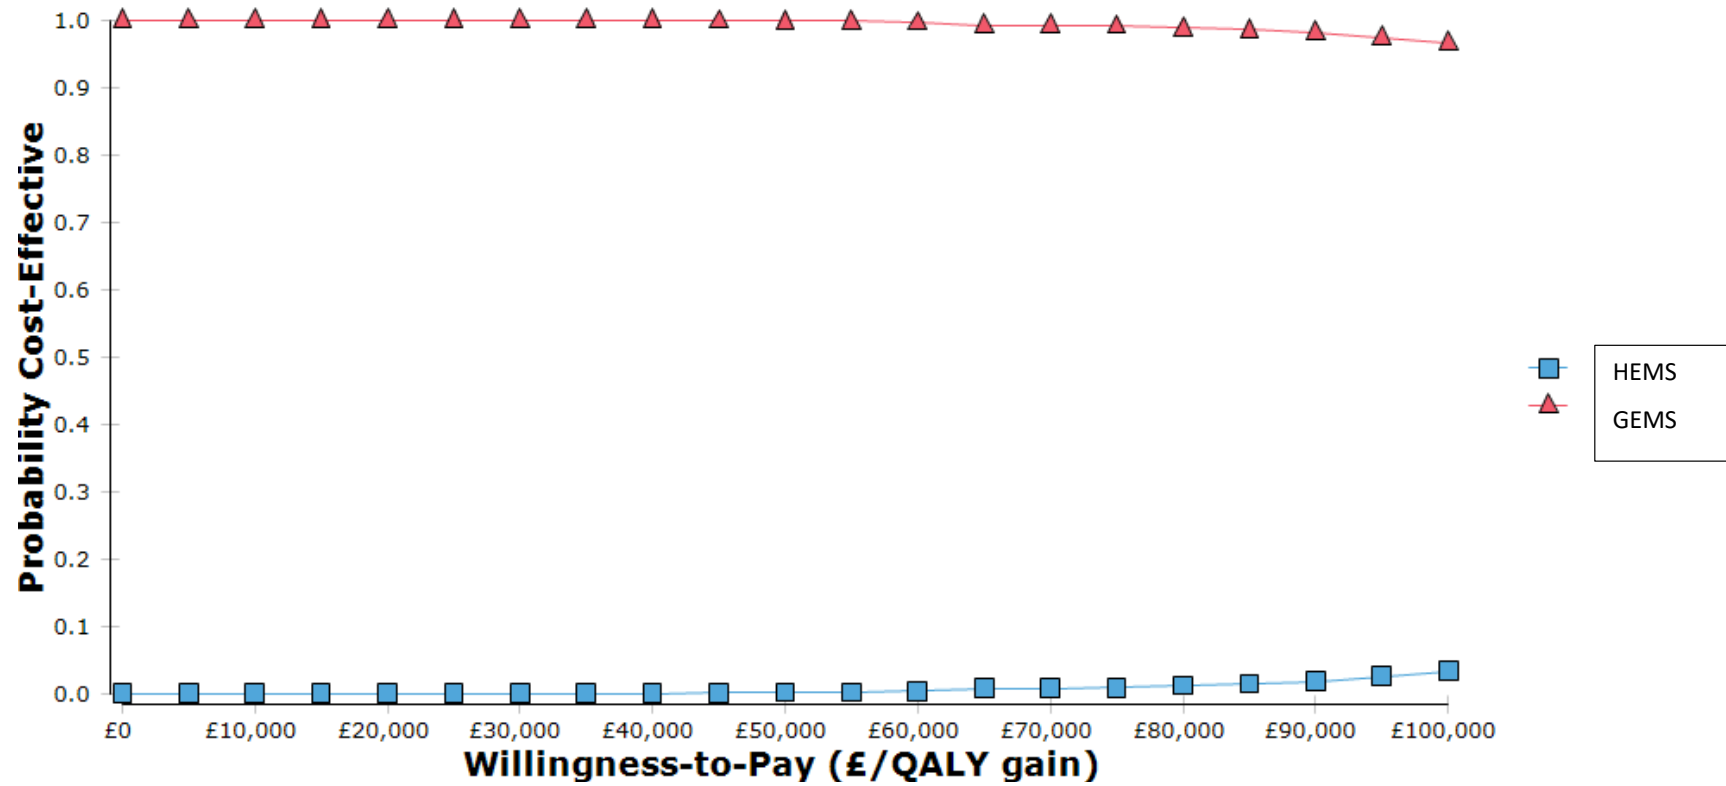

Figure S3: Cost-effectiveness acceptability curve for late presenters by transportation strategy

## References:

Alberts MJ, Ollenschleger MD, Nouh A. DAWN of a New Era for Stroke Treatment: Implications of the DAWN Study for Acute Stroke Care and Stroke Systems of Care. *Circulation* 2018; **137**(17):1767-69

Balami JS, McMeekin P, White PM, Flynn D, Wiggam I, Roffe C, Flynn P, Chembala J, Natarajan I, Dixit A, Hunter AM, Foddy L, Hopkins E, Coughlan D, Lumley H, Rice S, Burgess D, Craig D, Buchan AM, Ford GA, Gray A. Case Costing of Mechanical thrombectomy for acute ischaemic stroke in routine clinical setting: Cost differences between mothership vs drip and ship. *Presented at United Kingdom Stroke Forum (UKSF)*. 2018, Telford, UK.

Bank of England Inflation Calculator.

<https://www.bankofengland.co.uk/monetary-policy/inflation/inflation-calculator> [Last accessed: 7<sup>th</sup> May 2019]

British National Formulary (BNF) 76. September 2018. Available from <https://www.bnf.org/products/bnf-online/> [Last accessed: 16<sup>th</sup> April 2019]

Davis,S., Holmes,M., Simpson,E., Sutton,A. Alteplase for the treatment of acute ischaemic stroke (review of technology appraisal 122): A Single Technology Appraisal. SchARR, The University of Sheffield, 2012.

Department of Health. National schedule of reference costs, 2017-18. Available from: <https://improvement.nhs.uk/resources/reference-costs/> [Last accessed: 16<sup>th</sup> April 2019]

Ganesalingam J, Pizzo E, Morris S, *et al*. Cost-Utility Analysis of Mechanical Thrombectomy Using Stent Retrievers in Acute Ischemic Stroke. *Stroke* 2015;**46**:2591–8

Great North Air Ambulance. 2019. Darlington. UK – Available from: <https://www.greatnorthairambulance.co.uk/>

McMeekin P, Gray J, Ford GA, Duckett J, Price CI. A comparison of actual versus predicted emergency ambulance journey times using generic geographic information system software. *Emerg Med J* 2014; **31**(9), 758-762

McMeekin P, White P, James MA, *et al.* Estimating the number of UK stroke patients eligible for endovascular thrombectomy. *Eur Stroke J* 2017; **2**: 319–26

McMeekin P, Flynn D, Allen M, *et al.* Estimating the effectiveness and cost-effectiveness of establishing additional endovascular Thrombectomy stroke Centres in England: a discrete event simulation. *BMC Health Serv Res* **19**, 821 (2019)

Office for National Statistics (ONS). National life tables, UK Statistical bulletins 2018 - Available from:

<https://www.ons.gov.uk/peoplepopulationandcommunity/birthsdeathsandmarriages/lifeexpectancies/bulletins/nationallifetablesunitedkingdom/2015to2017> [Last accessed: 16<sup>th</sup> April 2019]

Sandercock P, Berge E, Dennis M, *et al.* A systematic review of the effectiveness, cost-effectiveness and barriers to implementation of thrombolytic and neuroprotective therapy for acute ischaemic stroke in the NHS. *Health Technol Assess* 2002; **6**:1–112.

Saver JL, Goyal M, Lutg A van der, *et al.* Time to Treatment With Endovascular Thrombectomy and Outcomes From Ischemic Stroke: A Meta-analysis. *JAMA* 2016;**316**:1279–89.

Sentinel Stroke National Audit Programme (SSNAP). Cost and Cost-effectiveness analysis – Technical report. 2016. Royal College of Physicians, London. Available from:

<https://www.strokeaudit.org/SupportFiles/Documents/Health-Economics/Health-economic-report-2016.aspx> [Last accessed: 16<sup>th</sup> April 2019]

SSNAP – Clinical Audit. Royal College of Physicians, London. Available from:

<https://www.strokeaudit.org/results/Organisational/National-Organisational.aspx>

Smyth C, Lorrimer S, Chaplin M. Advisory Committee on Resource Allocation (acra-2015-18A): Unavoidable smallness due to remoteness - identifying remote hospitals. Available at:

<https://www.england.nhs.uk/wp-content/uploads/2016/04/acra-2015-18A-unavoidable-smallness-upd.pdf> (Last accessed: 20<sup>th</sup> April 2020).

Stroke Association. State of the nation – Stroke statistics February 2018. Available from:

[https://www.stroke.org.uk/system/files/sotn\\_2018.pdf](https://www.stroke.org.uk/system/files/sotn_2018.pdf) (Last accessed: 16<sup>th</sup> April 2019)



Youman P, Wilson K, Harraf F, Kaira L. The economic burden of stroke in the United Kingdom. *Pharmacoeconomics* 2003; **21(S1)**:43-50

Xu XM, Vestesson E, Paley L, Desikan A, Wonderling D, Hoffman A, Wolfe CD, Rudd AG, Bray BD. The economic burden of stroke care in England, Wales and Northern Ireland: Using a national stroke register to estimate and report patient-level health economic outcomes in stroke. *Eur Stroke J* 2018; 3(1):82-91
